# Supplementary material for: Crystal structure, phase width, and physical properties of the barium tetrel selenides Ba6Si2−xGexSe12 (x = 0, 0.5, 1, and 1.5) with ultralow thermal conductivity
Source: Royal Society of Chemistry journal article supplement (doi:10.1039/d3dt02516k), 2023-01-01
Supplement: d3dt02516k1.pdf [file d3dt02516k1.pdf]

# Crystal Structure, Phase Width, and Physical Properties of the Barium Tetrel Selenides $\text{Ba}_6\text{Si}_{2-x}\text{Ge}_x\text{Se}_{12}$ ( $x = 0, 0.5, 1, \text{ and } 1.5$ ) with Ultralow Thermal Conductivity

Luke T. Menezes, Abdeljalil Assoud and Holger Kleinke\*

## SUPPORTING INFORMATION

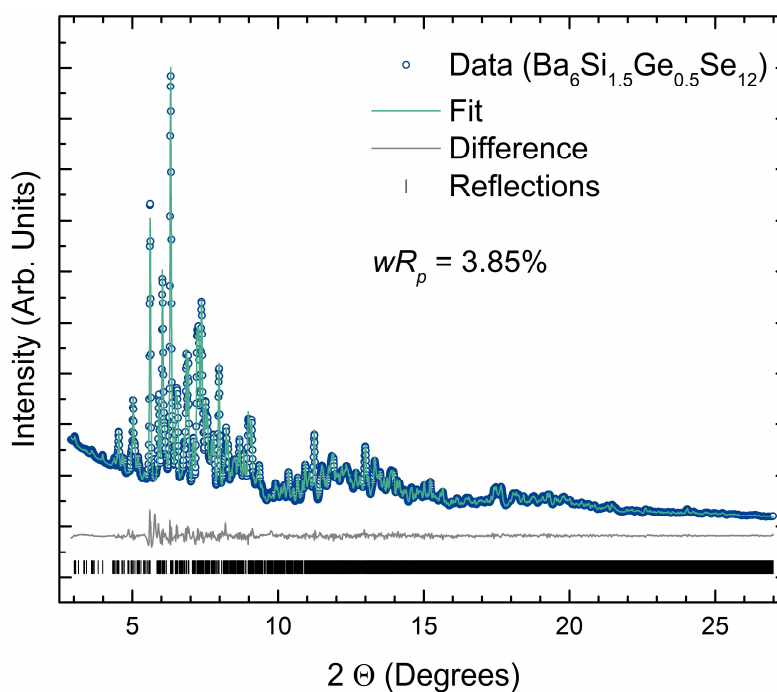

Fig. S1 Rietveld refinement plot for  $\text{Ba}_6\text{Si}_{2-x}\text{Ge}_x\text{Se}_{12}$  for  $x = 0.5$  including the Se4 and Se14 sites.

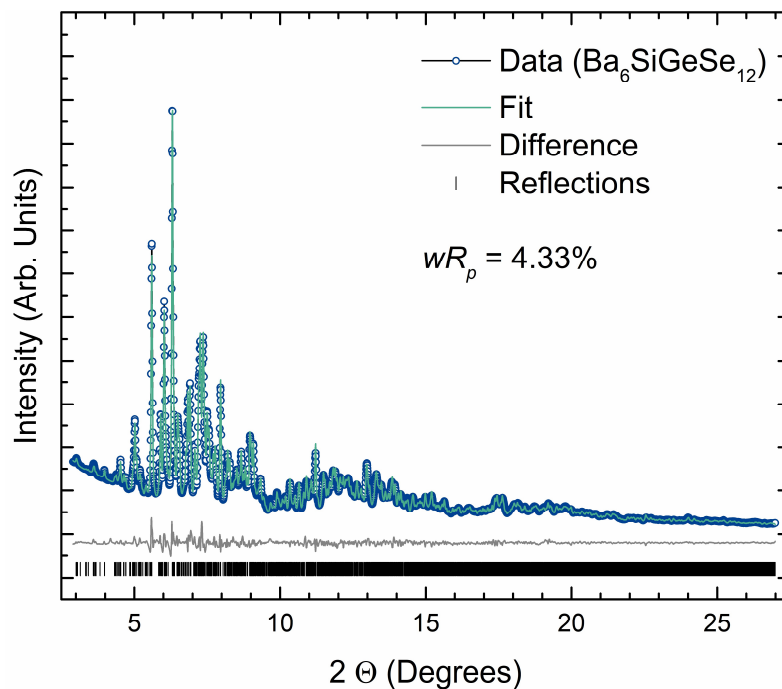

Fig. S2 Rietveld refinement plot for  $\text{Ba}_6\text{Si}_{2-x}\text{Ge}_x\text{Se}_{12}$  for  $x = 1$  including the Se4 and Se14 sites.

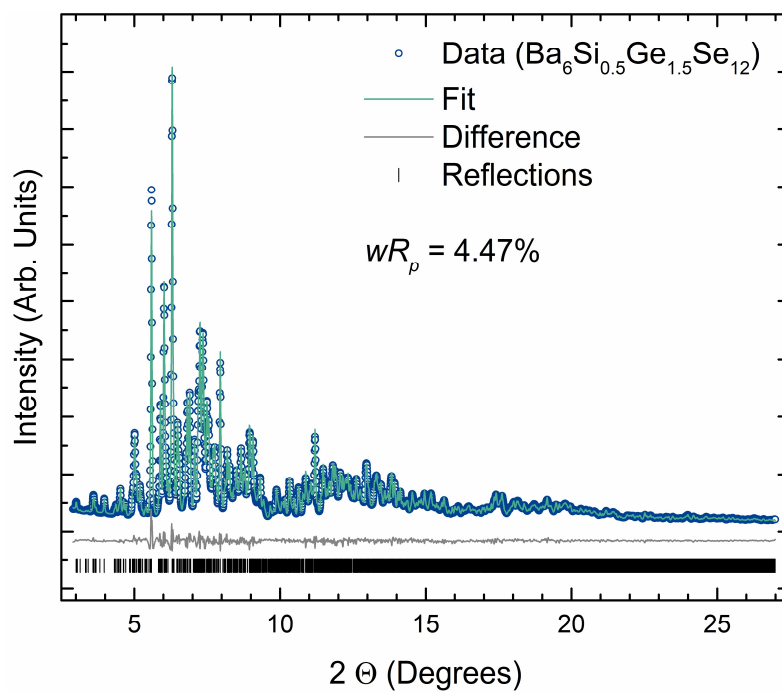

Fig. S3 Rietveld refinement plot for  $\text{Ba}_6\text{Si}_{2-x}\text{Ge}_x\text{Se}_{12}$  for  $x = 1.5$  including the Se4 and Se14 sites.

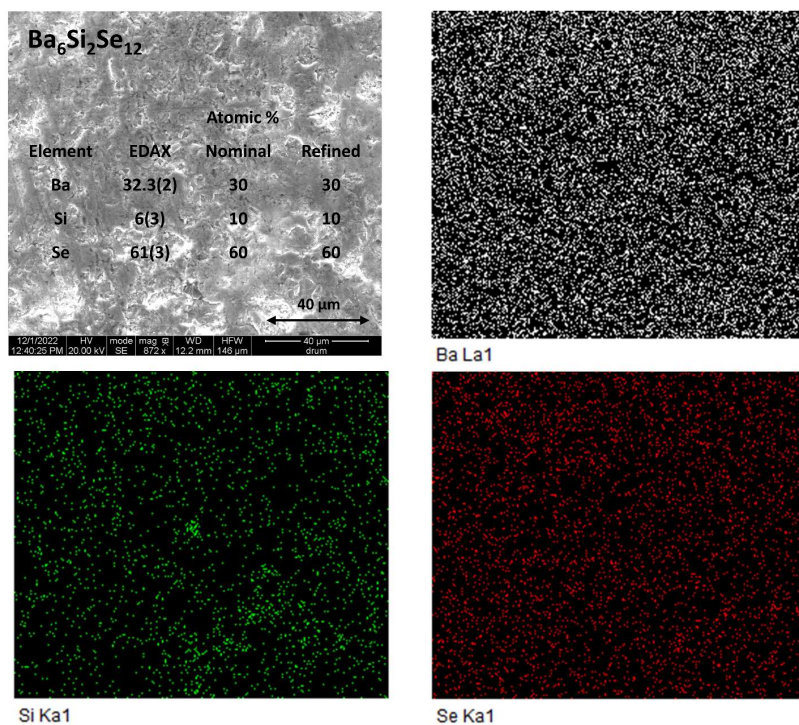

Fig. S4 EDAX and elemental mapping of the hot-pressed Ba<sub>6</sub>Si<sub>2</sub>Se<sub>12</sub> pellet.

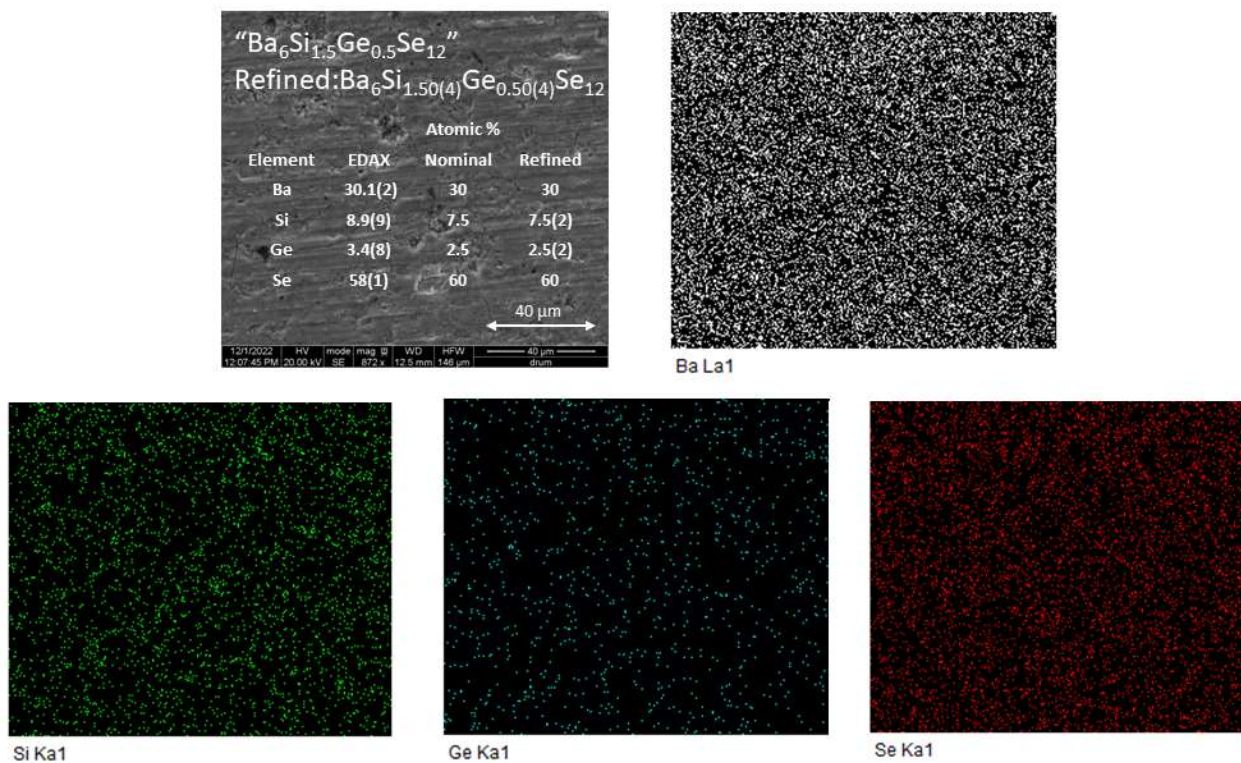

Fig. S5 EDAX and elemental mapping of the hot-pressed Ba<sub>6</sub>Si<sub>1.5</sub>Ge<sub>0.5</sub>Se<sub>12</sub> pellet.



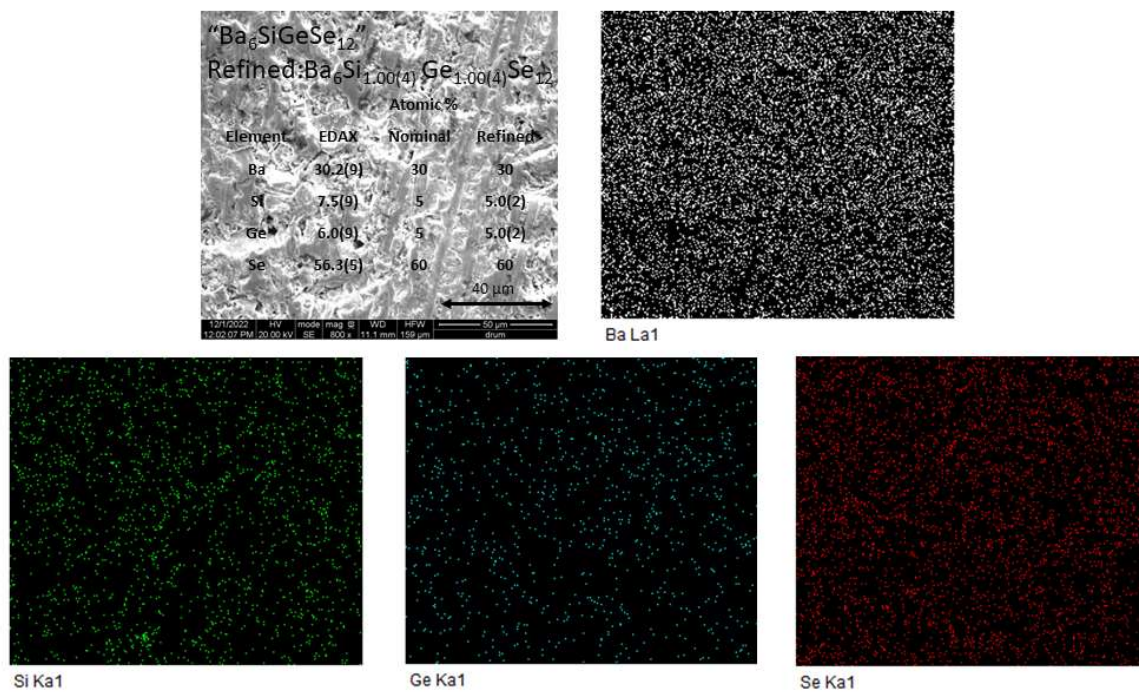

Fig. S6 EDAX and elemental mapping of the hot-pressed Ba<sub>6</sub>SiGeSe<sub>12</sub> pellet.

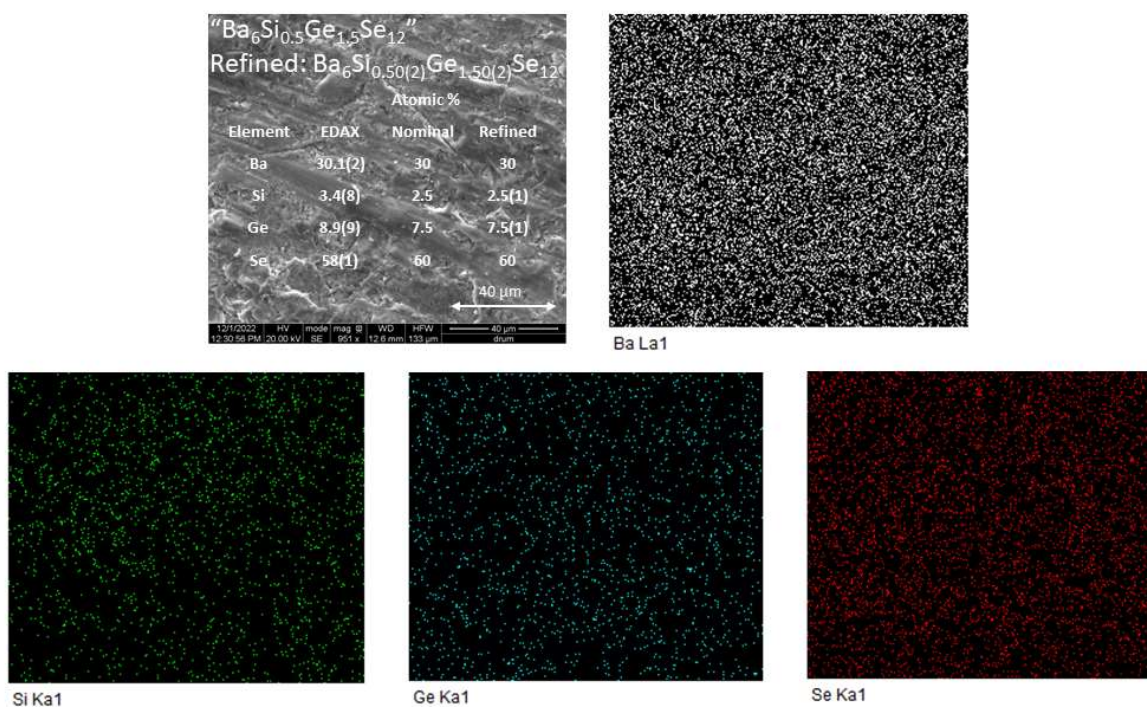

Fig. S7 EDAX and elemental mapping of the hot-pressed Ba<sub>6</sub>Si<sub>0.5</sub>Ge<sub>1.5</sub>Se<sub>12</sub> pellet.

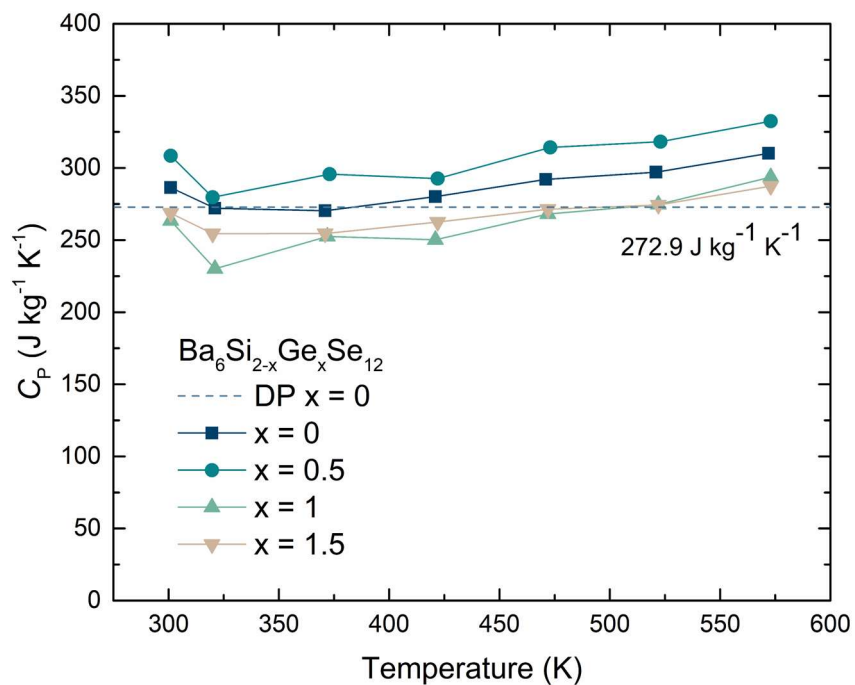

Fig. S8 Specific heat capacity curves of the  $\text{Ba}_6\text{Si}_{2-x}\text{Ge}_x\text{Se}_{12}$  samples and the Dulong-Petit limit of  $\text{Ba}_6\text{Si}_2\text{Se}_{12}$ .

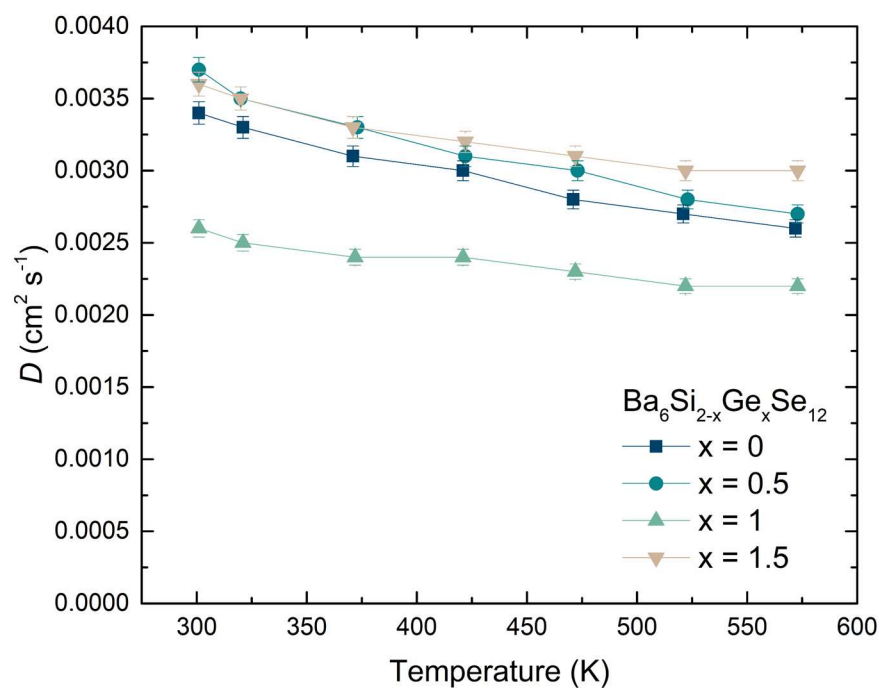

Fig. S9 Thermal diffusivity curves of the  $\text{Ba}_6\text{Si}_{2-x}\text{Ge}_x\text{Se}_{12}$  samples.

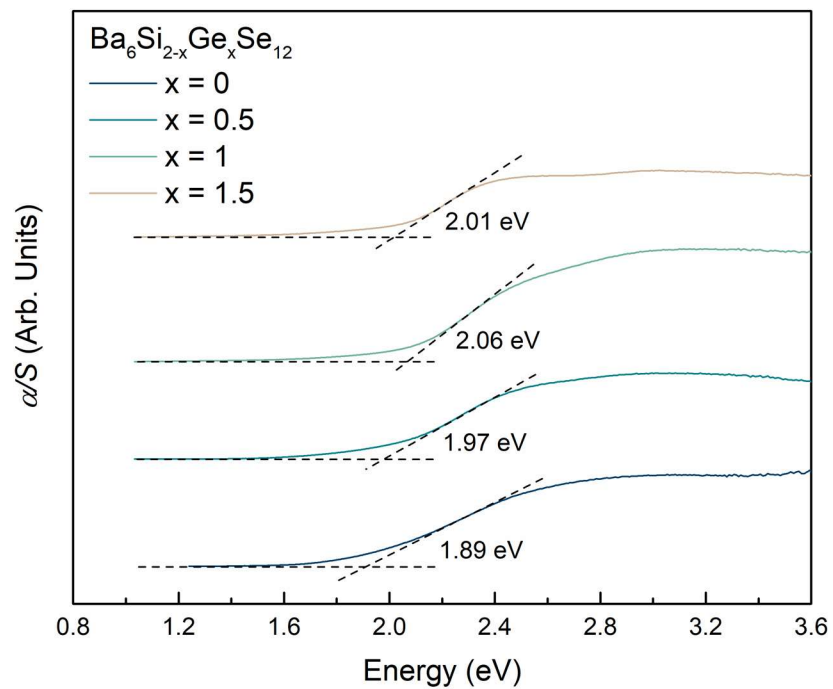

Fig. S10 Absorption spectra and band gap determination of the  $\text{Ba}_6\text{Si}_{2-x}\text{Ge}_x\text{Se}_{12}$  samples.

Table S1 Initial single crystal XRD model of Ba<sub>6</sub>Si<sub>2</sub>Se<sub>12</sub> with refined atomic positions,  $U_{eq}$ , and occupancies.  $a = 9.1830(12)$  Å,  $b = 12.2668(16)$  Å,  $c = 12.3522(17)$  Å,  $\alpha = 109.281(3)^\circ$ ,  $\beta = 104.699(3)^\circ$ ,  $\gamma = 100.447(3)^\circ$ ,  $R_1 = 0.0574$ ,  $wR_2 = 0.1751$ , GOF = 1.175.

| Atom | Site | x           | y           | z           | $U_{eq} / \text{Å}^2$ | occ.     |
|------|------|-------------|-------------|-------------|-----------------------|----------|
| Ba1  | 2i   | 0.07713(13) | 0.36082(10) | 0.60275(10) | 0.0181(2)             | 1        |
| Ba2  | 2i   | 0.09028(13) | 0.93737(10) | 0.17663(10) | 0.0178(2)             | 1        |
| Ba3  | 2i   | 0.28767(15) | 0.57805(11) | 0.06064(12) | 0.0243(3)             | 1        |
| Ba4  | 2i   | 0.31556(14) | 0.36150(11) | 0.30239(12) | 0.0225(2)             | 1        |
| Ba5  | 2i   | 0.34148(13) | 0.07302(10) | 0.59649(10) | 0.0170(2)             | 1        |
| Ba6  | 2i   | 0.65126(13) | 0.16125(10) | 0.17112(10) | 0.0184(2)             | 1        |
| Si1  | 2i   | 0.6109(5)   | 0.2779(4)   | 0.5281(4)   | 0.0115(8)             | 1        |
| Si2  | 2i   | 0.6362(5)   | 0.7803(4)   | 0.0424(4)   | 0.0123(8)             | 1        |
| Se1  | 2i   | 0.0095(2)   | 0.20011(18) | 0.31176(18) | 0.0193(4)             | 1        |
| Se2  | 2i   | 0.0112(2)   | 0.07529(18) | 0.42429(18) | 0.0202(4)             | 1        |
| Se3  | 2i   | 0.0358(4)   | 0.3423(3)   | 0.0307(3)   | 0.0221(7)             | 0.644(6) |
| Se5  | 2i   | 0.0614(4)   | 0.6076(3)   | 0.8048(3)   | 0.0273(8)             | 0.644(6) |
| Se4  | 2i   | 0.0458(7)   | 0.4933(6)   | 0.1832(6)   | 0.0265(14)            | 0.356(6) |
| Se14 | 2i   | 0.9390(9)   | 0.2811(6)   | 0.0829(7)   | 0.0358(17)            | 0.356(6) |
| Se6  | 2i   | 0.2022(2)   | 0.2644(2)   | 0.82078(19) | 0.0244(4)             | 1        |
| Se7  | 2i   | 0.2334(2)   | 0.78729(19) | 0.35038(19) | 0.0219(4)             | 1        |
| Se8  | 2i   | 0.2442(2)   | 0.08590(19) | 0.02163(19) | 0.0208(4)             | 1        |
| Se9  | 2i   | 0.2623(2)   | 0.59510(17) | 0.53851(18) | 0.0191(4)             | 1        |
| Se10 | 2i   | 0.4506(2)   | 0.11734(16) | 0.35779(16) | 0.0174(3)             | 1        |
| Se11 | 2i   | 0.4618(2)   | 0.36302(17) | 0.62892(19) | 0.0219(4)             | 1        |
| Se12 | 2i   | 0.4677(2)   | 0.86868(17) | 0.12078(17) | 0.0185(4)             | 1        |

Table S2 Rietveld refined atomic positions,  $U_{\text{iso}}$ , and occupancies of the  $\text{Ba}_6\text{Si}_2\text{Se}_{12}$  sample.  $a = 9.1821(7) \text{ \AA}$ ,  $b = 12.2634(15) \text{ \AA}$ ,  $c = 12.3636(18) \text{ \AA}$ ,  $\alpha = 109.278(3)^\circ$ ,  $\beta = 104.732(2)^\circ$ ,  $\gamma = 100.4061(16)^\circ$ .

| Atom | Site | x          | y          | z          | $U_{\text{iso}} / \text{\AA}^2$ | occ.      |
|------|------|------------|------------|------------|---------------------------------|-----------|
| Ba1  | $2i$ | 0.0742(8)  | 0.3597(6)  | 0.6023(6)  | 0.0214(5)                       | 1         |
| Ba2  | $2i$ | 0.0942(8)  | 0.9395(6)  | 0.1750(6)  | 0.0214(5)                       | 1         |
| Ba3  | $2i$ | 0.2870(8)  | 0.5731(6)  | 0.0611(6)  | 0.0214(5)                       | 1         |
| Ba4  | $2i$ | 0.3159(8)  | 0.3620(6)  | 0.3019(6)  | 0.0214(5)                       | 1         |
| Ba5  | $2i$ | 0.3429(8)  | 0.0760(6)  | 0.5964(6)  | 0.0214(5)                       | 1         |
| Ba6  | $2i$ | 0.6513(8)  | 0.1582(6)  | 0.1674(7)  | 0.0214(5)                       | 1         |
| Si1  | $2i$ | 0.6138(20) | 0.2807(16) | 0.5265(16) | 0.0115                          | 1         |
| Si2  | $2i$ | 0.630(2)   | 0.7801(18) | 0.0415(16) | 0.0123                          | 1         |
| Se1  | $2i$ | 0.0062(11) | 0.2017(9)  | 0.3163(10) | 0.0176(6)                       | 1         |
| Se2  | $2i$ | 0.0039(11) | 0.0703(11) | 0.4197(10) | 0.0176(6)                       | 1         |
| Se3  | $2i$ | 0.0253(18) | 0.3462(15) | 0.0332(14) | 0.023(3)                        | 0.666(10) |
| Se5  | $2i$ | 0.0760(19) | 0.6071(16) | 0.8090(14) | 0.023(3)                        | 0.666(10) |
| Se4  | $2i$ | 0.001(4)   | 0.480(3)   | 0.165(3)   | 0.023(3)                        | 0.334(10) |
| Se14 | $2i$ | 0.946(4)   | 0.271(3)   | 0.083(3)   | 0.023(3)                        | 0.334(10) |
| Se6  | $2i$ | 0.2037(13) | 0.2679(9)  | 0.8181(9)  | 0.0176(6)                       | 1         |
| Se7  | $2i$ | 0.2241(12) | 0.7849(9)  | 0.3482(9)  | 0.0176(6)                       | 1         |
| Se8  | $2i$ | 0.2474(12) | 0.0896(10) | 0.0203(10) | 0.0176(6)                       | 1         |
| Se9  | $2i$ | 0.2662(12) | 0.5945(10) | 0.5446(9)  | 0.0176(6)                       | 1         |
| Se10 | $2i$ | 0.4484(12) | 0.1174(9)  | 0.3561(9)  | 0.0176(6)                       | 1         |
| Se11 | $2i$ | 0.4645(12) | 0.3611(10) | 0.6314(10) | 0.0176(6)                       | 1         |
| Se12 | $2i$ | 0.4578(12) | 0.8662(11) | 0.1174(10) | 0.0176(6)                       | 1         |



Table S3 Rietveld refined atomic positions,  $U_{\text{iso}}$ , and occupancies of the  $\text{Ba}_6\text{Si}_{1.5}\text{Ge}_{0.5}\text{Se}_{12}$  sample.  $a = 9.1883(6)$  Å,  $b = 12.2785(13)$  Å,  $c = 12.3890(16)$  Å,  $\alpha = 109.269(3)^\circ$ ,  $\beta = 104.737(2)^\circ$ ,  $\gamma = 100.4291(15)^\circ$ .

| Atom | Site | x          | y          | z          | $U_{\text{iso}}/\text{Å}^2$ | occ.      |
|------|------|------------|------------|------------|-----------------------------|-----------|
| Ba1  | 2i   | 0.0764(7)  | 0.3609(5)  | 0.6008(5)  | 0.0179(4)                   | 1         |
| Ba2  | 2i   | 0.0939(7)  | 0.9385(5)  | 0.1758(5)  | 0.0179(4)                   | 1         |
| Ba3  | 2i   | 0.2867(7)  | 0.5760(5)  | 0.0575(5)  | 0.0179(4)                   | 1         |
| Ba4  | 2i   | 0.3160(7)  | 0.3609(5)  | 0.3025(6)  | 0.0179(4)                   | 1         |
| Ba5  | 2i   | 0.3432(7)  | 0.0747(5)  | 0.5973(5)  | 0.0179(4)                   | 1         |
| Ba6  | 2i   | 0.6541(7)  | 0.1604(5)  | 0.1708(6)  | 0.0179(4)                   | 1         |
| Si1  | 2i   | 0.6107(15) | 0.2742(13) | 0.5297(13) | 0.0115                      | 0.759(18) |
| Ge1  | 2i   | 0.6107(15) | 0.2742(13) | 0.5297(13) | 0.0115                      | 0.241(18) |
| Si2  | 2i   | 0.6350(16) | 0.7813(14) | 0.0371(13) | 0.0123                      | 0.741(18) |
| Ge2  | 2i   | 0.6350(16) | 0.7813(14) | 0.0371(13) | 0.0123                      | 0.259(18) |
| Se1  | 2i   | 0.0056(10) | 0.1957(9)  | 0.3090(9)  | 0.0233(6)                   | 1         |
| Se2  | 2i   | 0.0066(10) | 0.0719(10) | 0.4208(9)  | 0.0233(6)                   | 1         |
| Se3  | 2i   | 0.0352(15) | 0.3436(13) | 0.0345(12) | 0.0161(2)                   | 0.650(8)  |
| Se5  | 2i   | 0.0586(16) | 0.6060(13) | 0.8052(13) | 0.0161(2)                   | 0.650(8)  |
| Se4  | 2i   | 0.042(3)   | 0.498(2)   | 0.187(2)   | 0.0161(2)                   | 0.350(8)  |
| Se14 | 2i   | 0.945(3)   | 0.288(2)   | 0.091(2)   | 0.0161(2)                   | 0.350(8)  |
| Se6  | 2i   | 0.2008(11) | 0.2661(8)  | 0.8195(8)  | 0.0233(6)                   | 1         |
| Se7  | 2i   | 0.2350(11) | 0.7894(8)  | 0.3518(8)  | 0.0233(6)                   | 1         |
| Se8  | 2i   | 0.2440(11) | 0.0832(9)  | 0.0211(9)  | 0.0233(6)                   | 1         |
| Se9  | 2i   | 0.2592(11) | 0.5912(9)  | 0.5350(8)  | 0.0233(6)                   | 1         |
| Se10 | 2i   | 0.4501(11) | 0.1186(8)  | 0.3572(9)  | 0.0233(6)                   | 1         |
| Se11 | 2i   | 0.4607(11) | 0.3619(9)  | 0.6304(9)  | 0.0233(6)                   | 1         |
| Se12 | 2i   | 0.4695(10) | 0.8703(10) | 0.1226(9)  | 0.0233(6)                   | 1         |
| Se13 | 2i   | 0.5147(12) | 0.3896(9)  | 0.1223(10) | 0.0233(6)                   | 1         |

Table S4 Rietveld refined atomic positions,  $U_{\text{iso}}$ , and occupancies of the  $\text{Ba}_6\text{SiGeSe}_{12}$  sample.  $a = 9.1954(8) \text{ \AA}$ ,  $b = 12.2964(16) \text{ \AA}$ ,  $c = 12.426(2) \text{ \AA}$ ,  $\alpha = 109.259(3)^\circ$ ,  $\beta = 104.774(3)^\circ$ ,  $\gamma = 100.4122(17)^\circ$ .

| Atom | Site | x          | y          | z          | $U_{\text{iso}}/\text{\AA}^2$ | occ.     |
|------|------|------------|------------|------------|-------------------------------|----------|
| Ba1  | 2i   | 0.0763(8)  | 0.3579(6)  | 0.5978(6)  | 0.0196(5)                     | 1        |
| Ba2  | 2i   | 0.0968(8)  | 0.9407(5)  | 0.1749(6)  | 0.0196(5)                     | 1        |
| Ba3  | 2i   | 0.2797(8)  | 0.5749(6)  | 0.0568(6)  | 0.0196(5)                     | 1        |
| Ba4  | 2i   | 0.3180(8)  | 0.3616(6)  | 0.3000(7)  | 0.0196(5)                     | 1        |
| Ba5  | 2i   | 0.3415(8)  | 0.0740(6)  | 0.5952(6)  | 0.0196(5)                     | 1        |
| Ba6  | 2i   | 0.6534(8)  | 0.1605(6)  | 0.1683(7)  | 0.0196(5)                     | 1        |
| Si1  | 2i   | 0.6139(14) | 0.2794(12) | 0.5297(12) | 0.0115                        | 0.49(2)  |
| Ge1  | 2i   | 0.6139(14) | 0.2794(12) | 0.5297(12) | 0.0115                        | 0.51(2)  |
| Si2  | 2i   | 0.6342(15) | 0.7804(13) | 0.0418(12) | 0.0123                        | 0.51(2)  |
| Ge2  | 2i   | 0.6342(15) | 0.7804(13) | 0.0418(12) | 0.0123                        | 0.49(2)  |
| Se1  | 2i   | 0.0106(11) | 0.1993(9)  | 0.3133(10) | 0.0203(6)                     | 1        |
| Se2  | 2i   | 0.0014(11) | 0.0683(11) | 0.4189(10) | 0.0203(6)                     | 1        |
| Se3  | 2i   | 0.0354(18) | 0.3484(15) | 0.0413(14) | 0.013(3)                      | 0.615(9) |
| Se5  | 2i   | 0.0694(19) | 0.6115(15) | 0.8053(14) | 0.013(3)                      | 0.615(9) |
| Se4  | 2i   | 0.026(3)   | 0.488(2)   | 0.181(2)   | 0.013(3)                      | 0.385(9) |
| Se14 | 2i   | 0.968(3)   | 0.284(2)   | 0.087(2)   | 0.013(3)                      | 0.385(9) |
| Se6  | 2i   | 0.2000(13) | 0.2688(10) | 0.8184(10) | 0.0203(6)                     | 1        |
| Se7  | 2i   | 0.2231(12) | 0.7841(9)  | 0.3490(10) | 0.0203(6)                     | 1        |
| Se8  | 2i   | 0.2438(12) | 0.0851(9)  | 0.0222(10) | 0.0203(6)                     | 1        |
| Se9  | 2i   | 0.2659(13) | 0.5883(10) | 0.5409(9)  | 0.0203(6)                     | 1        |
| Se10 | 2i   | 0.4531(12) | 0.1197(9)  | 0.3571(9)  | 0.0203(6)                     | 1        |
| Se11 | 2i   | 0.4573(12) | 0.3642(9)  | 0.6333(10) | 0.0203(6)                     | 1        |
| Se12 | 2i   | 0.4583(11) | 0.8671(10) | 0.1172(10) | 0.0203(6)                     | 1        |
| Se13 | 2i   | 0.5168(13) | 0.3936(10) | 0.1209(10) | 0.0203(6)                     | 1        |

Table S5 Rietveld refined atomic positions,  $U_{\text{iso}}$ , and occupancies of the  $\text{Ba}_6\text{Si}_{0.5}\text{Ge}_{1.5}\text{Se}_{12}$  sample.  $a = 9.1986(5)$  Å,  $b = 12.3114(11)$  Å,  $c = 12.4532(14)$  Å,  $\alpha = 109.250(2)^\circ$ ,  $\beta = 104.7701(19)^\circ$ ,  $\gamma = 100.4056(12)^\circ$ .

| Atom | Site | x          | y          | z          | $U_{\text{iso}}/\text{Å}^2$ | occ.      |
|------|------|------------|------------|------------|-----------------------------|-----------|
| Ba1  | $2i$ | 0.0779(6)  | 0.3600(4)  | 0.5985(4)  | 0.0177(3)                   | 1         |
| Ba2  | $2i$ | 0.0945(6)  | 0.9395(4)  | 0.1766(5)  | 0.0177(3)                   | 1         |
| Ba3  | $2i$ | 0.2802(6)  | 0.5755(4)  | 0.0557(5)  | 0.0177(3)                   | 1         |
| Ba4  | $2i$ | 0.3173(6)  | 0.3621(4)  | 0.3015(5)  | 0.0177(3)                   | 1         |
| Ba5  | $2i$ | 0.3443(6)  | 0.0739(4)  | 0.5965(5)  | 0.0177(3)                   | 1         |
| Ba6  | $2i$ | 0.6532(6)  | 0.1596(4)  | 0.1678(5)  | 0.0177(3)                   | 1         |
| Si1  | $2i$ | 0.6121(10) | 0.2766(8)  | 0.5305(8)  | 0.0115                      | 0.201(14) |
| Ge1  | $2i$ | 0.6121(10) | 0.2766(8)  | 0.5305(8)  | 0.0115                      | 0.799(14) |
| Si2  | $2i$ | 0.6372(11) | 0.7803(9)  | 0.0428(9)  | 0.0123                      | 0.299(14) |
| Ge2  | $2i$ | 0.6372(11) | 0.7803(9)  | 0.0428(9)  | 0.0123                      | 0.701(14) |
| Se1  | $2i$ | 0.0071(9)  | 0.2005(7)  | 0.3124(7)  | 0.0216(5)                   | 1         |
| Se2  | $2i$ | 0.0062(8)  | 0.0715(8)  | 0.4207(8)  | 0.0216(5)                   | 1         |
| Se3  | $2i$ | 0.0400(14) | 0.3444(12) | 0.0372(11) | 0.017(2)                    | 0.604(8)  |
| Se5  | $2i$ | 0.0588(15) | 0.6087(12) | 0.8036(12) | 0.017(2)                    | 0.604(8)  |
| Se4  | $2i$ | 0.032(2)   | 0.4929(16) | 0.1827(18) | 0.017(2)                    | 0.396(8)  |
| Se14 | $2i$ | 0.958(2)   | 0.2926(17) | 0.0827(17) | 0.017(2)                    | 0.396(8)  |
| Se6  | $2i$ | 0.1984(10) | 0.2686(7)  | 0.8194(7)  | 0.0216(5)                   | 1         |
| Se7  | $2i$ | 0.2262(9)  | 0.7889(7)  | 0.3515(7)  | 0.0216(5)                   | 1         |
| Se8  | $2i$ | 0.2424(10) | 0.0830(7)  | 0.0196(8)  | 0.0216(5)                   | 1         |
| Se9  | $2i$ | 0.2610(9)  | 0.5895(8)  | 0.5390(7)  | 0.0216(5)                   | 1         |
| Se10 | $2i$ | 0.4534(10) | 0.1211(7)  | 0.3551(7)  | 0.0216(5)                   | 1         |
| Se11 | $2i$ | 0.4588(10) | 0.3640(7)  | 0.6368(8)  | 0.0216(5)                   | 1         |
| Se12 | $2i$ | 0.4646(9)  | 0.8682(8)  | 0.1201(7)  | 0.0216(5)                   | 1         |
| Se13 | $2i$ | 0.5153(10) | 0.3951(7)  | 0.1209(8)  | 0.0216(5)                   | 1         |

Table S6 Rietveld refined atomic positions,  $U_{\text{iso}}$ , and occupancies of the  $\text{Ba}_6\text{Si}_2\text{Se}_{12}$  sample without Se4 and Se14.  $a = 9.1802(7) \text{ \AA}$ ,  $b = 12.2610(16) \text{ \AA}$ ,  $c = 12.3604(20) \text{ \AA}$ ,  $\alpha = 109.275(3)^\circ$ ,  $\beta = 104.7356(26)^\circ$ ,  $\gamma = 100.4072(18)^\circ$ .

| Atom | Site | x          | y          | z          | $U_{\text{iso}} / \text{\AA}^2$ | occ. |
|------|------|------------|------------|------------|---------------------------------|------|
| Ba1  | $2i$ | 0.0732(9)  | 0.3608(7)  | 0.6002(7)  | 0.0185(5)                       | 1    |
| Ba2  | $2i$ | 0.0933(9)  | 0.9384(6)  | 0.1735(6)  | 0.0185(5)                       | 1    |
| Ba3  | $2i$ | 0.2863(8)  | 0.5734(6)  | 0.0628(7)  | 0.0185(5)                       | 1    |
| Ba4  | $2i$ | 0.3176(9)  | 0.3588(7)  | 0.3009(7)  | 0.0185(5)                       | 1    |
| Ba5  | $2i$ | 0.3404(8)  | 0.0759(7)  | 0.5941(7)  | 0.0185(5)                       | 1    |
| Ba6  | $2i$ | 0.6542(9)  | 0.1567(7)  | 0.1691(7)  | 0.0185(5)                       | 1    |
| Si1  | $2i$ | 0.604(3)   | 0.288(3)   | 0.535(3)   | 0.0115                          | 1    |
| Si2  | $2i$ | 0.629(3)   | 0.758(3)   | 0.024(3)   | 0.0123                          | 1    |
| Se1  | $2i$ | 0.0073(12) | 0.2010(10) | 0.3152(11) | 0.0171(6)                       | 1    |
| Se2  | $2i$ | 0.0008(12) | 0.0637(11) | 0.4153(11) | 0.0171(6)                       | 1    |
| Se3  | $2i$ | 0.0118(18) | 0.3384(14) | 0.0359(14) | <b>0.074(3)</b>                 | 1    |
| Se5  | $2i$ | 0.0697(19) | 0.6001(13) | 0.8137(14) | <b>0.074(3)</b>                 | 1    |
| Se6  | $2i$ | 0.2095(14) | 0.2678(10) | 0.8208(10) | 0.0171(6)                       | 1    |
| Se7  | $2i$ | 0.2179(13) | 0.7864(10) | 0.3484(10) | 0.0171(6)                       | 1    |
| Se8  | $2i$ | 0.2505(13) | 0.0902(11) | 0.0176(11) | 0.0171(6)                       | 1    |
| Se9  | $2i$ | 0.2606(13) | 0.5984(10) | 0.5477(10) | 0.0171(6)                       | 1    |
| Se10 | $2i$ | 0.4455(13) | 0.1187(10) | 0.3509(10) | 0.0171(6)                       | 1    |
| Se11 | $2i$ | 0.4605(14) | 0.3634(11) | 0.6305(11) | 0.0171(6)                       | 1    |
| Se12 | $2i$ | 0.4538(13) | 0.8607(12) | 0.1143(11) | 0.0171(6)                       | 1    |
| Se13 | $2i$ | 0.5109(15) | 0.3871(11) | 0.1189(12) | 0.0171(6)                       | 1    |

Table S7 Rietveld refined atomic positions,  $U_{\text{iso}}$ , and occupancies of the  $\text{Ba}_6\text{Si}_{1.5}\text{Ge}_{0.5}\text{Se}_{12}$  sample without Se4 and Se14.  $a = 9.1886(7) \text{ \AA}$ ,  $b = 12.2786(15) \text{ \AA}$ ,  $c = 12.3891(19) \text{ \AA}$ ,  $\alpha = 109.267(3)^\circ$ ,  $\beta = 104.7380(25)^\circ$ ,  $\gamma = 100.4316(17)^\circ$ .

| Atom | Site | x          | y          | z          | $U_{\text{iso}} / \text{\AA}^2$ | occ.    |
|------|------|------------|------------|------------|---------------------------------|---------|
| Ba1  | $2i$ | 0.0753(8)  | 0.3622(6)  | 0.6007(6)  | 0.0163(4)                       | 1       |
| Ba2  | $2i$ | 0.0940(8)  | 0.9397(6)  | 0.1740(6)  | 0.0163(4)                       | 1       |
| Ba3  | $2i$ | 0.2838(8)  | 0.5745(6)  | 0.0568(6)  | 0.0163(4)                       | 1       |
| Ba4  | $2i$ | 0.3160(8)  | 0.3579(6)  | 0.2999(7)  | 0.0163(4)                       | 1       |
| Ba5  | $2i$ | 0.3428(7)  | 0.0757(6)  | 0.5958(6)  | 0.0163(4)                       | 1       |
| Ba6  | $2i$ | 0.6556(8)  | 0.1580(6)  | 0.1704(7)  | 0.0163(4)                       | 1       |
| Si1  | $2i$ | 0.605(2)   | 0.262(2)   | 0.529(2)   | 0.0115                          | 0.85(2) |
| Ge1  | $2i$ | 0.605(2)   | 0.262(2)   | 0.529(2)   | 0.0115                          | 0.15(2) |
| Si2  | $2i$ | 0.6349(19) | 0.7769(17) | 0.0301(17) | 0.0123                          | 0.65(2) |
| Ge2  | $2i$ | 0.6349(19) | 0.7769(17) | 0.0301(17) | 0.0123                          | 0.35(2) |
| Se1  | $2i$ | 0.0084(12) | 0.1963(10) | 0.3099(10) | 0.0203(6)                       | 1       |
| Se2  | $2i$ | 0.0024(11) | 0.0667(11) | 0.4189(10) | 0.0203(6)                       | 1       |
| Se3  | $2i$ | 0.0241(16) | 0.3325(12) | 0.0331(12) | <b>0.069(3)</b>                 | 1       |
| Se5  | $2i$ | 0.0497(17) | 0.6057(12) | 0.8147(13) | <b>0.069(3)</b>                 | 1       |
| Se6  | $2i$ | 0.2042(13) | 0.2666(9)  | 0.8184(10) | 0.0203(6)                       | 1       |
| Se7  | $2i$ | 0.2299(12) | 0.7922(9)  | 0.3537(10) | 0.0203(6)                       | 1       |
| Se8  | $2i$ | 0.2474(13) | 0.0821(10) | 0.0192(10) | 0.0203(6)                       | 1       |
| Se9  | $2i$ | 0.2572(12) | 0.5929(10) | 0.5385(10) | 0.0203(6)                       | 1       |
| Se10 | $2i$ | 0.4472(13) | 0.1176(9)  | 0.3534(10) | 0.0203(6)                       | 1       |
| Se11 | $2i$ | 0.4610(13) | 0.3621(10) | 0.6300(11) | 0.0203(6)                       | 1       |
| Se12 | $2i$ | 0.4665(12) | 0.8689(11) | 0.1207(11) | 0.0203(6)                       | 1       |
| Se13 | $2i$ | 0.5193(14) | 0.3929(11) | 0.1243(11) | 0.0203(6)                       | 1       |



Table S8 Rietveld refined atomic positions,  $U_{\text{iso}}$ , and occupancies of the  $\text{Ba}_6\text{SiGeSe}_{12}$  sample without Se4 and Se14.  $a = 9.1950(9) \text{ \AA}$ ,  $b = 12.2971(18) \text{ \AA}$ ,  $c = 12.4263(23) \text{ \AA}$ ,  $\alpha = 109.257(4)^\circ$ ,  $\beta = 104.7701(31)^\circ$ ,  $\gamma = 100.4126(20)^\circ$ .

| Atom | Site | x           | y          | z          | $U_{\text{iso}} / \text{\AA}^2$ | occ.    |
|------|------|-------------|------------|------------|---------------------------------|---------|
| Ba1  | $2i$ | 0.0729(9)   | 0.3599(7)  | 0.5966(6)  | 0.0169(5)                       | 1       |
| Ba2  | $2i$ | 0.0955(9)   | 0.9406(6)  | 0.1740(7)  | 0.0169(5)                       | 1       |
| Ba3  | $2i$ | 0.2783(8)   | 0.5734(6)  | 0.0556(7)  | 0.0169(5)                       | 1       |
| Ba4  | $2i$ | 0.3179(9)   | 0.3583(7)  | 0.2966(8)  | 0.0169(5)                       | 1       |
| Ba5  | $2i$ | 0.3397(8)   | 0.0738(7)  | 0.5928(7)  | 0.0169(5)                       | 1       |
| Ba6  | $2i$ | 0.6547(9)   | 0.1583(7)  | 0.1688(7)  | 0.0169(5)                       | 1       |
| Si1  | $2i$ | 0.6100(19)  | 0.2764(17) | 0.5255(17) | 0.0115                          | 0.56(2) |
| Ge1  | $2i$ | 0.6100(19)  | 0.2764(17) | 0.5255(17) | 0.0115                          | 0.44(2) |
| Si2  | $2i$ | 0.6339(17)  | 0.7715(16) | 0.0407(15) | 0.0123                          | 0.44(2) |
| Ge2  | $2i$ | 0.6339(17)  | 0.7715(16) | 0.0407(15) | 0.0123                          | 0.56(2) |
| Se1  | $2i$ | 0.0124(12)  | 0.1995(10) | 0.3116(11) | 0.0186(7)                       | 1       |
| Se2  | $2i$ | -0.0006(12) | 0.0615(12) | 0.4153(11) | 0.0186(7)                       | 1       |
| Se3  | $2i$ | 0.0234(18)  | 0.3365(14) | 0.0417(15) | <b>0.075(3)</b>                 | 1       |
| Se5  | $2i$ | 0.053(2)    | 0.6002(13) | 0.8108(15) | <b>0.075(3)</b>                 | 1       |
| Se6  | $2i$ | 0.2031(14)  | 0.2687(10) | 0.8194(11) | 0.0186(7)                       | 1       |
| Se7  | $2i$ | 0.2178(13)  | 0.7903(10) | 0.3532(11) | 0.0186(7)                       | 1       |
| Se8  | $2i$ | 0.2486(14)  | 0.0849(11) | 0.0200(12) | 0.0186(7)                       | 1       |
| Se9  | $2i$ | 0.2585(13)  | 0.5899(11) | 0.5432(11) | 0.0186(7)                       | 1       |
| Se10 | $2i$ | 0.4517(14)  | 0.1200(10) | 0.3530(11) | 0.0186(7)                       | 1       |
| Se11 | $2i$ | 0.4542(14)  | 0.3657(11) | 0.6313(12) | 0.0186(7)                       | 1       |
| Se12 | $2i$ | 0.4555(13)  | 0.8629(11) | 0.1166(11) | 0.0186(7)                       | 1       |
| Se13 | $2i$ | 0.5199(15)  | 0.3948(11) | 0.1237(12) | 0.0186(7)                       | 1       |

Table S9 Rietveld refined atomic positions,  $U_{\text{iso}}$ , and occupancies of the  $\text{Ba}_6\text{Si}_{0.5}\text{Ge}_{1.5}\text{Se}_{12}$  sample without Se4 and Se14.  $a = 9.1985(7) \text{ \AA}$ ,  $b = 12.3118(14) \text{ \AA}$ ,  $c = 12.4533(17) \text{ \AA}$ ,  $\alpha = 109.2472(30)^\circ$ ,  $\beta = 104.7677(23)^\circ$ ,  $\gamma = 100.4070(15)^\circ$

| Atom | Site | x          | y          | z          | $U_{\text{iso}} / \text{\AA}^2$ | occ.      |
|------|------|------------|------------|------------|---------------------------------|-----------|
| Ba1  | $2i$ | 0.0763(7)  | 0.3622(5)  | 0.5985(5)  | 0.0161(4)                       | 1         |
| Ba2  | $2i$ | 0.0932(7)  | 0.9397(5)  | 0.1754(6)  | 0.0161(4)                       | 1         |
| Ba3  | $2i$ | 0.2793(7)  | 0.5749(5)  | 0.0556(6)  | 0.0161(4)                       | 1         |
| Ba4  | $2i$ | 0.3171(7)  | 0.3593(5)  | 0.2981(6)  | 0.0161(4)                       | 1         |
| Ba5  | $2i$ | 0.3428(7)  | 0.0740(5)  | 0.5939(5)  | 0.0161(4)                       | 1         |
| Ba6  | $2i$ | 0.6528(7)  | 0.1566(5)  | 0.1666(6)  | 0.0161(4)                       | 1         |
| Si1  | $2i$ | 0.6092(12) | 0.2700(11) | 0.5259(11) | 0.0115                          | 0.261(16) |
| Ge1  | $2i$ | 0.6092(12) | 0.2700(11) | 0.5259(11) | 0.0115                          | 0.739(16) |
| Si2  | $2i$ | 0.6363(13) | 0.7757(11) | 0.0415(10) | 0.0123                          | 0.239(16) |
| Ge2  | $2i$ | 0.6363(13) | 0.7757(11) | 0.0415(10) | 0.0123                          | 0.761(16) |
| Se1  | $2i$ | 0.0087(10) | 0.2008(8)  | 0.3120(9)  | 0.0186(6)                       | 1         |
| Se2  | $2i$ | 0.0029(10) | 0.0654(9)  | 0.4192(9)  | 0.0186(6)                       | 1         |
| Se3  | $2i$ | 0.0215(15) | 0.3316(11) | 0.0404(12) | <b>0.082(3)</b>                 | 1         |
| Se5  | $2i$ | 0.0448(16) | 0.5998(11) | 0.8120(12) | <b>0.082(3)</b>                 | 1         |
| Se6  | $2i$ | 0.2006(12) | 0.2682(8)  | 0.8198(9)  | 0.0186(6)                       | 1         |
| Se7  | $2i$ | 0.2214(11) | 0.7927(8)  | 0.3536(9)  | 0.0186(6)                       | 1         |
| Se8  | $2i$ | 0.2480(11) | 0.0819(9)  | 0.0197(9)  | 0.0186(6)                       | 1         |
| Se9  | $2i$ | 0.2564(11) | 0.5908(9)  | 0.5405(9)  | 0.0186(6)                       | 1         |
| Se10 | $2i$ | 0.4493(12) | 0.1208(8)  | 0.3507(8)  | 0.0186(6)                       | 1         |
| Se11 | $2i$ | 0.4582(12) | 0.3654(9)  | 0.6341(9)  | 0.0186(6)                       | 1         |
| Se12 | $2i$ | 0.4610(11) | 0.8650(9)  | 0.1206(9)  | 0.0186(6)                       | 1         |
| Se13 | $2i$ | 0.5186(12) | 0.3963(9)  | 0.1207(9)  | 0.0186(6)                       | 1         |
